# Supplementary material
Source: publisher figshare collection journal article supplement (https://tandf.figshare.com/ndownloader/files/25491996)
Supplement: Supplementary file 1 [file 25491996]

| Supplementary.1 World Health Organization Classification of Soft Tissue Sarcoma | | | |
| --- | --- | --- | --- |
| ICD-O-3 | Description | ICD-O-3 | Description |
| 9364 | Peripheral neuroectodermal tumor | 8920 | Alveolar rhabdomyosarcoma |
| 9581 | Alveolar soft part sarcoma | 8910 | Embryonal rhabdomyosarcoma |
| 9540 | Malignant peripheral nerve sheath tumor | 8900 | Rhabdomyosarcoma |
| 9260 | Ewing sarcoma | 8896 | Myxoid leiomyosarcoma |
| 9220 | Chondrosarcoma | 8895 | Myosarcoma |
| 9180 | Osteosarcoma | 8894 | Angiomyosarcoma |
| 9170 | Lymphangiosarcoma | 8891 | Epithelioid leiomyosarcoma |
| 9150 | Hemangiopericytoma | 8890 | Leiomyosarcoma |
| 9133 | Epithelioid hemangioendothelioma | 8854 | Pleomorphic liposarcoma |
| 9130 | Hemangioendothelioma | 8850 | Liposarcoma |
| 9124 | Kupffer cell sarcoma | 8830 | Malignant fibrous histiocytoma |
| 9120 | Hemangiosarcoma | 8815 | Solitary fibrous tumor |
| 9044 | Clear cell sarcoma | 8810 | Fibrosarcoma |
| 9043 | Synovial sarcoma | 8806 | Desmoplastic small round cell tumor |
| 9041 | Synovial sarcoma, spindle cell | 8805 | Undifferentiated sarcoma |
| 9040 | Synovial sarcoma | 8804 | Epithelioid sarcoma |
| 8990 | Mesenchymoma, malignant | 8803 | Small cell sarcoma |
| 8991 | Embryonal sarcoma | 8802 | Giant cell sarcoma |
| 8982 | Malignant myoepithelioma | 8801 | Spindle cell sarcoma |
| 8980 | Carcinosarcoma | 8800 | Sarcoma, NOS |
| 8936 | Gastrointestinal stromal sarcoma | 8711 | Glomus tumor |
| 8935 | Stromal sarcoma, NOS |  |  |

ICD-O-3: International Classification of Diseases for Oncology, Third Revision
